# Supplementary material for: Identifying variation in GP referral rates: an observational study of outpatient headache referrals
Source: bioRxiv or medRxiv preprint supplement (doi:10.1101/2022.02.07.22270572), 2023-05-25

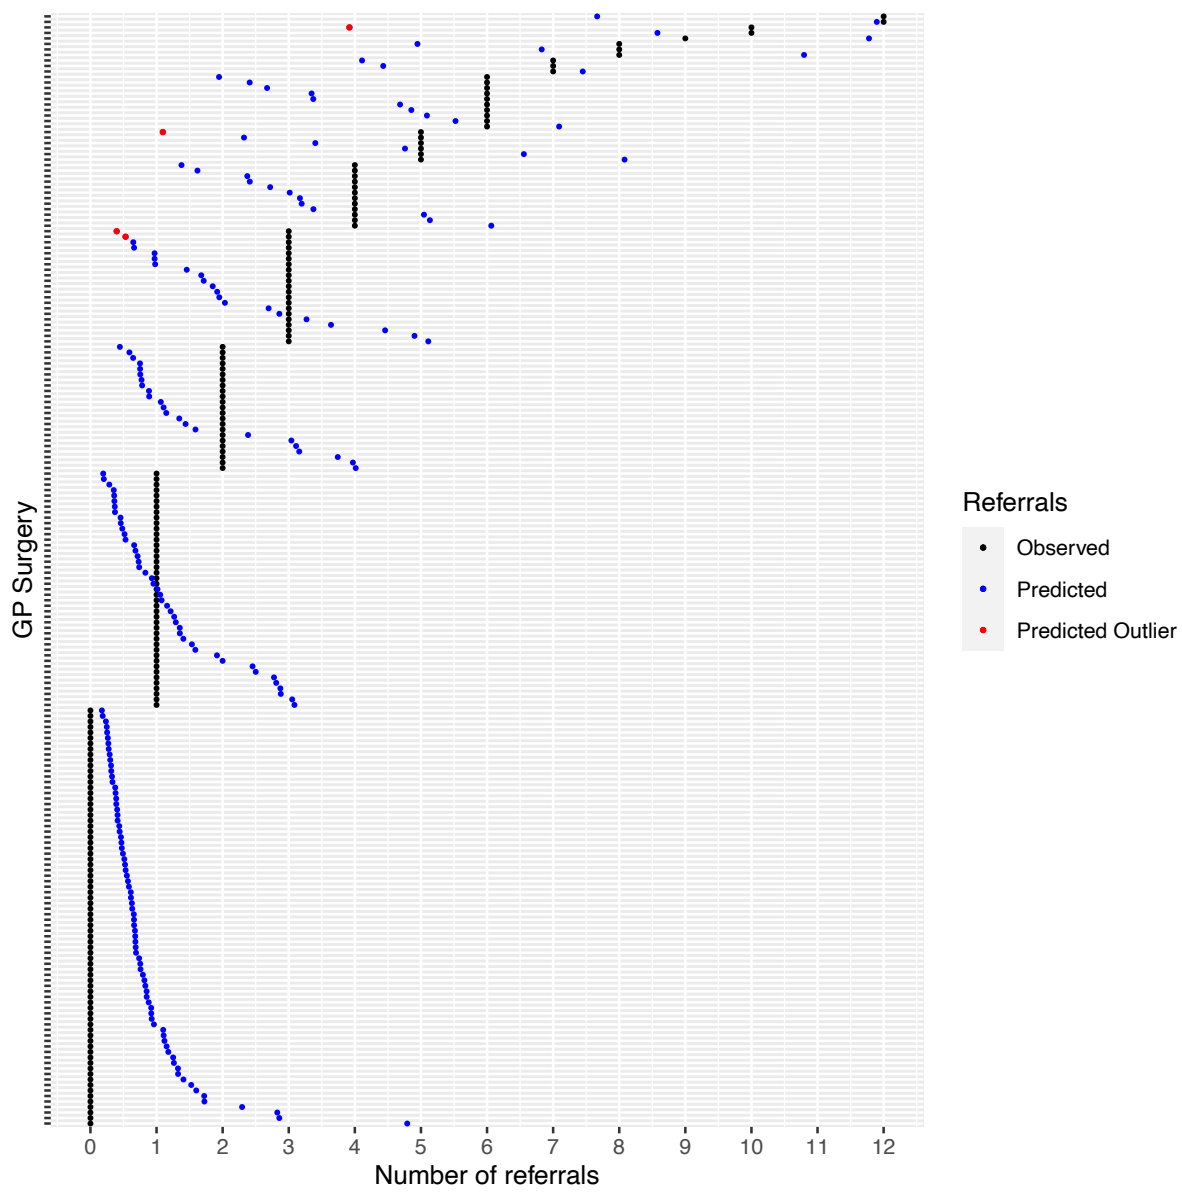

Supplement: Supplementary file [file media-1.pdf]
